# Supplementary material for: Patient-Reported Financial Burden Following Stereotactic Body Radiation Therapy for Localized Prostate Cancer
Source: PubMed Central journal article supplement (PMC8990911; doi:10.3389/fonc.2022.852844), 2022-03-25
Supplement: DataSheet_1.pdf [file DataSheet_1.pdf]

## COST – FACIT (Version 2)

Below is a list of statements that other people with your illness have said are important. **Please circle or mark one number per line to indicate your response as it applies to the past 7 days.**

|      |                                                                                                             | Not<br>at all | A little<br>bit | Some-<br>what | Quite<br>a bit | Very<br>much |
|------|-------------------------------------------------------------------------------------------------------------|---------------|-----------------|---------------|----------------|--------------|
| FT1  | I know that I have enough money in savings, retirement, or assets to cover the costs of my treatment.....   | 0             | 1               | 2             | 3              | 4            |
| FT2  | My out-of-pocket medical expenses are more than I thought they would be .....                               | 0             | 1               | 2             | 3              | 4            |
| FT3  | I worry about the financial problems I will have in the future as a result of my illness or treatment ..... | 0             | 1               | 2             | 3              | 4            |
| FT4  | I feel I have no choice about the amount of money I spend on care .....                                     | 0             | 1               | 2             | 3              | 4            |
| FT5  | I am frustrated that I cannot work or contribute as much as I usually do.....                               | 0             | 1               | 2             | 3              | 4            |
| FT6  | I am satisfied with my current financial situation .....                                                    | 0             | 1               | 2             | 3              | 4            |
| FT7  | I am able to meet my monthly expenses .....                                                                 | 0             | 1               | 2             | 3              | 4            |
| FT8  | I feel financially stressed.....                                                                            | 0             | 1               | 2             | 3              | 4            |
| FT9  | I am concerned about keeping my job and income, including work at home.....                                 | 0             | 1               | 2             | 3              | 4            |
| FT10 | My cancer or treatment has reduced my satisfaction with my present financial situation .....                | 0             | 1               | 2             | 3              | 4            |
| FT11 | I feel in control of my financial situation.....                                                            | 0             | 1               | 2             | 3              | 4            |
| FT12 | My illness has been a financial hardship to my family and me .....                                          | 0             | 1               | 2             | 3              | 4            |
